# Supplementary material for: Effectiveness of regdanvimab treatment for SARS-CoV-2 delta variant, which exhibited decreased in vitro activity: a nationwide real-world multicenter cohort study
Source: PubMed Central journal article supplement (PMC10225538; doi:10.3389/fcimb.2023.1192512), 2023-05-15
Supplement: DataSheet_1.pdf [file DataSheet_1.pdf]

### **Ordinal disease severity scores**

- **Score 1** (no limitation of daily activities)
- **Score 2** (limitation of daily activities but no need for supplemental O<sub>2</sub>)
- **Score 3** (need for supplemental O<sub>2</sub> via nasal prong)
- **Score 4** (need for supplemental O<sub>2</sub> via facial mask)
- **Score 5** (need for high-flow supplemental O<sub>2</sub> or noninvasive mechanical ventilation)
- **Score 6** (need for invasive mechanical ventilation)
- **Score 7** (multi-organ failure or the need for extracorporeal membrane oxygenation therapy)
- **Score 8** (death)

**Supplementary Table 1. Univariable and multivariable analyses for 21-day probability of O<sub>2</sub> requirement, total cohort**

| Factors for disease progression              | Univariable analysis |                | Multivariable analysis |                |
|----------------------------------------------|----------------------|----------------|------------------------|----------------|
|                                              | HR (95% CI)          | <i>P</i> value | HR (95% CI)            | <i>P</i> value |
| <b>Demographics</b>                          |                      |                |                        |                |
| Age                                          | 1.020 (1.014–1.025)  | <0.001         |                        |                |
| Age > 60 years                               | 1.448 (1.216–1.725)  | <0.001         |                        |                |
| Age > 70 years                               | 1.950 (1.617–2.352)  | <0.001         | 2.037 (1.643–2.526)    | <0.001         |
| Male gender                                  | 1.194 (1.002–1.422)  | 0.047          | 0.902 (0.748–1.086)    | 0.277          |
| BMI                                          | 1.045 (1.024–1.066)  | <0.001         |                        |                |
| BMI ≥ 25 kg/m <sup>2</sup>                   | 1.563 (1.311–1.863)  | <0.001         | 1.504 (1.254–1.803)    | <0.001         |
| BMI ≥ 30 kg/m <sup>2</sup>                   | 1.358 (1.031–1.789)  | 0.030          |                        |                |
| Symptom onset to admission, days             | 1.197 (1.147–1.248)  | <0.001         | 1.097 (1.048–1.148)    | <0.001         |
| Vaccination (incomplete or complete)         | 0.815 (0.621–1.069)  | 0.139          |                        |                |
| Vaccination (complete only)                  | 0.463 (0.267–0.802)  | 0.006          | 0.374 (0.212–0.660)    | 0.001          |
| <b>Initial presentation</b>                  |                      |                |                        |                |
| SpO <sub>2</sub> , %                         | 0.704 (0.649–0.763)  | <0.001         |                        |                |
| SpO <sub>2</sub> < 97%                       | 2.006 (1.653–2.433)  | <0.001         | 1.669 (1.371–2.033)    | <0.001         |
| Pneumonia                                    | 1.495 (1.184–1.887)  | 0.001          | 1.594 (1.246–2.039)    | <0.001         |
| <b>Initial laboratory tests</b>              |                      |                |                        |                |
| WBC count, x10 <sup>3</sup> /μL              | 1.016 (0.984–1.050)  | 0.332          |                        |                |
| WBC count > 5500/μL                          | 1.284 (1.069–1.543)  | 0.008          |                        |                |
| Leukopenia (< 4000/μL)                       | 0.769 (0.630–0.939)  | 0.010          |                        |                |
| Neutrophil > 3500/μL                         | 1.561 (1.310–1.859)  | <0.001         | 1.390 (1.157–1.670)    | <0.001         |
| Lymphopenia (< 1500/μL)                      | 1.488 (1.203–1.839)  | <0.001         |                        |                |
| Platelet count, x10 <sup>3</sup> /μL         | 0.991 (0.989–0.993)  | <0.001         |                        |                |
| Thrombocytopenia (< 150x10 <sup>3</sup> /μL) | 2.469 (2.071–2.943)  | <0.001         | 1.830 (1.518–2.206)    | <0.001         |
| Total bilirubin, mg/dL                       | 0.988 (0.787–1.241)  | 0.920          |                        |                |
| Albumin, g/dL                                | 0.308 (0.247–0.384)  | <0.001         |                        |                |
| Albumin < 4.0 g/dL                           | 2.454 (1.974–3.051)  | <0.001         | 1.376 (1.090–1.736)    | 0.007          |
| AST, IU/L                                    | 1.004 (1.003–1.005)  | <0.001         |                        |                |
| ALT, IU/L                                    | 1.002 (1.001–1.003)  | 0.001          |                        |                |
| BUN, mg/dL                                   | 1.004 (1.002–1.006)  | <0.001         |                        |                |
| BUN elevation (> 19 mg/dL)                   | 1.888 (1.522–2.343)  | <0.001         |                        |                |
| Creatinine, mg/dL                            | 1.175 (1.086–1.272)  | <0.001         |                        |                |
| Creatinine elevation (> 1.2 mg/dL)           | 1.930 (1.497–2.488)  | <0.001         | 1.318 (1.007–1.725)    | 0.044          |
| LDH, IU/L                                    | 1.000 (1.000–1.001)  | 0.355          |                        |                |
| LDH elevation (> 400 IU/L)                   | 1.138 (0.928–1.396)  | 0.215          |                        |                |
| CRP, mg/dL                                   | 1.143 (1.126–1.161)  | <0.001         |                        |                |
| CRP elevation (> 1.5 mg/dL)                  | 3.726 (3.102–4.475)  | <0.001         | 2.487 (2.027–3.051)    | <0.001         |
| CRP elevation (> 5 mg/dL)                    | 3.539 (2.898–4.322)  | <0.001         |                        |                |
| <b>Underlying diseases</b>                   |                      |                |                        |                |
| Cardiovascular disease                       | 1.088 (0.785–1.509)  | 0.612          |                        |                |

|                              |                            |                  |                            |                  |
|------------------------------|----------------------------|------------------|----------------------------|------------------|
| Respiratory disease          | 0.764 (0.464–1.257)        | 0.290            |                            |                  |
| Diabetes mellitus            | 1.448 (1.171–1.792)        | 0.001            | 1.278 (1.026–1.593)        | 0.029            |
| Hypertension                 | 1.373 (1.149–1.641)        | <0.001           | 1.137 (0.928–1.394)        | 0.216            |
| Liver disease                | 1.905 (0.475–7.639)        | 0.363            |                            |                  |
| Renal disease                | 2.354 (1.053–5.266)        | 0.037            | 0.756 (0.323–1.770)        | 0.519            |
| Solid cancer, curative       | 0.739 (0.426–1.281)        | 0.281            |                            |                  |
| Solid cancer, metastasis     | 2.449 (1.267–4.734)        | 0.008            | 3.741 (1.907–7.339)        | <0.001           |
| Delta-confirmed              | 0.965 (0.808–1.152)        | 0.691            |                            |                  |
| <b>Regdanvimab treatment</b> | <b>0.660 (0.552–0.789)</b> | <b>&lt;0.001</b> | <b>0.677 (0.561–0.816)</b> | <b>&lt;0.001</b> |

Initial Ct value was not included because only 1,911 patients (86.3%) were tested. Factors that exhibited extreme 95% CIs without statistical significance are not presented in this table.

Abbreviations: HR, hazard ratio; CI, confidence interval; BMI, body mass index; SpO<sub>2</sub>, saturation of percutaneous oxygen; WBC, white blood cell; ALT, alanine aminotransferase; AST, aspartate aminotransferase; BMI, body mass index; BUN, blood urea nitrogen; LDH, lactate dehydrogenase; CRP, C-reactive protein

**Supplementary Table 2. Univariable and multivariable analyses for 21-day probability of progression to severe disease, total cohort**

| Factors for disease progression              | Univariable analysis |                | Multivariable analysis |                |
|----------------------------------------------|----------------------|----------------|------------------------|----------------|
|                                              | HR (95% CI)          | <i>P</i> value | HR (95% CI)            | <i>P</i> value |
| <b>Demographics</b>                          |                      |                |                        |                |
| Age                                          | 1.021 (1.010–1.032)  | <0.001         |                        |                |
| Age > 60 years                               | 1.493 (1.063–2.097)  | 0.021          |                        |                |
| Age > 70 years                               | 1.663 (1.149–2.408)  | 0.007          | 1.574 (1.039–2.383)    | 0.032          |
| Male gender                                  | 1.693 (1.195–2.400)  | 0.003          | 1.480 (1.027–2.135)    | 0.036          |
| BMI                                          | 1.040 (1.001–1.081)  | 0.045          |                        |                |
| BMI ≥ 25 kg/m <sup>2</sup>                   | 1.818 (1.286–2.569)  | 0.001          | 1.830 (1.283–2.610)    | 0.001          |
| BMI ≥ 30 kg/m <sup>2</sup>                   | 1.292 (0.755–2.211)  | 0.350          |                        |                |
| Symptom onset to admission, days             | 1.129 (1.040–1.224)  | 0.004          | 0.985 (0.898–1.081)    | 0.750          |
| Vaccination (incomplete or complete)         | 0.550 (0.297–1.019)  | 0.058          |                        |                |
| Vaccination (complete only)                  | 0.137 (0.019–0.982)  | 0.048          | 0.180 (0.025–1.311)    | 0.091          |
| <b>Initial presentation</b>                  |                      |                |                        |                |
| SpO <sub>2</sub> , %                         | 0.556 (0.477–0.647)  | <0.001         |                        |                |
| SpO <sub>2</sub> < 97%                       | 4.078 (2.904–5.727)  | <0.001         | 3.104 (2.189–4.402)    | <0.001         |
| Pneumonia                                    | 1.479 (0.936–2.336)  | 0.093          | 1.696 (1.043–2.759)    | 0.033          |
| <b>Initial laboratory tests</b>              |                      |                |                        |                |
| WBC count, x10 <sup>3</sup> /μL              | 1.024 (0.968–1.085)  | 0.406          |                        |                |
| WBC count > 5500/μL                          | 1.163 (0.811–1.668)  | 0.411          |                        |                |
| Leukopenia (< 4000/μL)                       | 0.936 (0.665–1.394)  | 0.840          |                        |                |
| Neutrophil > 3500/μL                         | 1.717 (1.220–2.417)  | 0.002          |                        |                |
| Lymphopenia (< 1500/μL)                      | 2.598 (1.581–4.268)  | <0.001         | 2.182 (1.291–3.687)    | 0.004          |
| Platelet count, x10 <sup>3</sup> /μL         | 0.989 (0.986–0.992)  | <0.001         |                        |                |
| Thrombocytopenia (< 150x10 <sup>3</sup> /μL) | 2.357 (1.678–3.309)  | <0.001         | 1.501 (1.051–2.142)    | 0.026          |
| Total bilirubin, mg/dL                       | 1.074 (0.767–1.505)  | 0.677          |                        |                |
| Albumin, g/dL                                | 0.226 (0.153–0.332)  | <0.001         |                        |                |
| Albumin < 4.0 g/dL                           | 3.503 (2.406–5.101)  | <0.001         | 2.134 (1.407–3.236)    | <0.001         |
| AST, IU/L                                    | 1.005 (1.003–1.007)  | <0.001         |                        |                |
| ALT, IU/L                                    | 1.003 (1.001–1.005)  | 0.010          |                        |                |
| BUN, mg/dL                                   | 1.002 (0.996–1.008)  | 0.517          |                        |                |
| BUN elevation (> 19 mg/dL)                   | 2.221 (1.500–3.291)  | <0.001         | 1.441 (0.930–2.233)    | 0.102          |
| Creatinine, mg/dL                            | 1.119 (0.936–1.338)  | 0.218          |                        |                |
| Creatinine elevation (> 1.2 mg/dL)           | 2.025 (1.259–3.257)  | 0.004          |                        |                |
| LDH, IU/L                                    | 1.003 (1.002–1.004)  | <0.001         |                        |                |
| LDH elevation (> 400 IU/L)                   | 2.231 (1.571–3.169)  | <0.001         | 1.189 (0.804–1.759)    | 0.386          |
| CRP, mg/dL                                   | 1.143 (1.115–1.171)  | <0.001         |                        |                |
| CRP elevation (> 1.5 mg/dL)                  | 4.392 (3.025–6.376)  | <0.001         |                        |                |
| CRP elevation (> 5 mg/dL)                    | 5.320 (3.753–7.540)  | <0.001         | 2.860 (1.956–4.182)    | <0.001         |
| <b>Underlying diseases</b>                   |                      |                |                        |                |
| Cardiovascular disease                       | 0.713 (0.333–1.526)  | 0.383          |                        |                |
| Respiratory disease                          | 0.356 (0.088–1.438)  | 0.147          |                        |                |
| Diabetes mellitus                            | 1.230 (0.802–1.887)  | 0.343          |                        |                |

|                              |                     |        |                     |        |
|------------------------------|---------------------|--------|---------------------|--------|
| Hypertension                 | 1.249 (0.881–1.770) | 0.212  |                     |        |
| Liver disease                | 0.987 (0.138–7.059) | 0.990  |                     |        |
| Renal disease                | 1.370 (0.192–9.795) | 0.754  |                     |        |
| Solid cancer, curative       | 0.664 (0.211–2.084) | 0.482  |                     |        |
| Solid cancer, metastasis     | 0.845 (0.118–6.042) | 0.867  |                     |        |
| Delta-confirmed              | 0.735 (0.515–1.047) | 0.088  | 1.045 (0.682–1.601) | 0.839  |
| <b>Regdanvimab treatment</b> | 0.493 (0.344–0.707) | <0.001 | 0.489 (0.337–0.709) | <0.001 |

Initial Ct value was not included because only 1,911 patients (86.3%) were tested. Factors that exhibited extreme 95% CIs without statistical significance are not presented in this table.

Abbreviations: HR, hazard ratio; CI, confidence interval; BMI, body mass index; SpO<sub>2</sub>, saturation of percutaneous oxygen; WBC, white blood cell; ALT, alanine aminotransferase; AST, aspartate aminotransferase; BMI, body mass index; BUN, blood urea nitrogen; LDH, lactate dehydrogenase; CRP, C-reactive protein

**Supplementary Table 3. Comparison of the pre-delta and delta-confirmed patients, baseline characteristics**

| <b>Characteristic</b>                  | <b>Pre-delta<br/>(n = 1,275)</b> | <b>Delta-confirmed<br/>(n = 939)</b> | <b>P value</b> |
|----------------------------------------|----------------------------------|--------------------------------------|----------------|
| <b>Demographics</b>                    |                                  |                                      |                |
| Age, years                             | 61 (50–71)                       | 48 (33–61)                           | <0.001         |
| Male gender                            | 624 (48.9)                       | 469 (49.9)                           | 0.640          |
| BMI                                    | 24.7 ± 3.7                       | 25.2 ± 4.4                           | 0.003          |
| BMI ≥ 25 kg/m <sup>2</sup>             | 547 (43.0)                       | 448 (47.8)                           | 0.027          |
| BMI ≥ 30 kg/m <sup>2</sup>             | 94 (7.4)                         | 106 (11.3)                           | 0.002          |
| Symptom onset to admission, days       | 2 (1–4)                          | 3 (1–5)                              | <0.001         |
| Vaccination (incomplete or complete)   | 0 (0.0)                          | 306 (32.6)                           | <0.001         |
| Vaccination (complete only)            | 0 (0.0)                          | 112 (11.9)                           | <0.001         |
| <b>Initial presentation</b>            |                                  |                                      |                |
| Initial Ct value (NP swab, RdRp)       | 20.1 ± 6.0                       | 17.9 ± 5.6                           | <0.001         |
| SpO <sub>2</sub> , %                   | 97.4 ± 1.1                       | 97.4 ± 1.0                           | 0.269          |
| SpO <sub>2</sub> < 97%                 | 238 (18.7)                       | 168 (17.9)                           | 0.641          |
| Pneumonia                              | 865 (67.8)                       | 859 (91.5)                           | <0.001         |
| <b>Initial laboratory tests</b>        |                                  |                                      |                |
| WBC count, x10 <sup>3</sup> /μL        | 5.1 ± 1.9                        | 4.8 ± 2.5                            | 0.026          |
| Lymphocyte count, x10 <sup>3</sup> /μL | 1.3 ± 0.7                        | 1.2 ± 0.5                            | <0.001         |
| Platelet count, x10 <sup>3</sup> /μL   | 195.0 ± 70.6                     | 182.8 ± 63.7                         | <0.001         |
| Total bilirubin, mg/dL                 | 0.6 ± 0.3                        | 0.5 ± 0.5                            | 0.048          |
| Albumin, g/dL                          | 4.4 ± 0.4                        | 4.4 ± 0.4                            | 0.173          |
| AST, IU/L                              | 33.4 ± 26.6                      | 37.1 ± 35.9                          | 0.006          |
| ALT, IU/L                              | 31.8 ± 37.1                      | 35.3 ± 34.2                          | 0.023          |
| BUN, mg/dL                             | 15.2 ± 8.3                       | 14.2 ± 24.1                          | 0.238          |
| Creatinine, mg/dL                      | 0.9 ± 0.6                        | 0.9 ± 0.5                            | 0.595          |
| LDH, IU/L                              | 319.4 ± 129.0                    | 301.7 ± 141.5                        | 0.003          |
| CRP, mg/dL                             | 1.8 ± 3.0                        | 2.4 ± 3.0                            | <0.001         |
| <b>Underlying diseases</b>             |                                  |                                      |                |
| Cardiovascular disease                 | 100 (7.8)                        | 56 (6.0)                             | 0.088          |
| Respiratory disease                    | 58 (4.5)                         | 31 (3.3)                             | 0.140          |
| Diabetes mellitus                      | 266 (20.9)                       | 97 (10.3)                            | <0.001         |
| Hypertension                           | 519 (40.7)                       | 213 (22.7)                           | <0.001         |
| Liver disease                          | 3 (0.2)                          | 2 (0.2)                              | 0.913          |
| Renal disease                          | 10 (0.8)                         | 2 (0.2)                              | 0.070          |
| Solid cancer, curative                 | 38 (3.0)                         | 34 (3.6)                             | 0.401          |
| Solid cancer, metastasis               | 18 (1.4)                         | 1 (0.1)                              | 0.001          |
| Solid organ transplant                 | 0 (0.0)                          | 1 (0.1)                              | 0.244          |

Data are expressed as the number (%) of patients, mean ± SD, or median (IQR) unless indicated otherwise.

Abbreviations: COVID-19, coronavirus disease 2019, BMI, body mass index; Ct, cycle threshold; NP,

nasopharyngeal; RdRp, RNA-dependent RNA polymerase; SpO<sub>2</sub>, saturation of percutaneous oxygen; WBC, white blood cell; AST, aspartate aminotransferase; ALT, alanine aminotransferase; BUN, blood urea nitrogen; CPK, creatine phosphokinase; LDH, lactate dehydrogenase; CRP, C-reactive protein; SD, standard deviation; IQR, interquartile range

**Supplementary Table 4. Comparison of the pre-delta and delta-confirmed patients, treatment and outcomes**

| <b>Variables</b>                                      | <b>Pre-delta<br/>(n = 1,275)</b> | <b>Delta-confirmed<br/>(n = 939)</b> | <b>P value</b> |
|-------------------------------------------------------|----------------------------------|--------------------------------------|----------------|
| <b>Regdanvimab</b>                                    |                                  |                                      |                |
| Regdanvimab treatment                                 | 403 (31.6)                       | 692 (73.7)                           | <0.001         |
| Interval from symptom onset to regdanvimab, days      | 3.4 ± 2.0                        | 3.7 ± 1.9                            | 0.004          |
| Interval from admission to regdanvimab, days          | 1.5 ± 1.3                        | 0.8 ± 1.2                            | <0.001         |
| <b>Remdesivir, steroid, and antibiotics</b>           |                                  |                                      |                |
| Remdesivir treatment                                  | 136 (10.7)                       | 143 (15.2)                           | 0.001          |
| Interval from admission to remdesivir, days           | 3.7 ± 3.0                        | 2.2 ± 2.2                            | <0.001         |
| Steroid treatment                                     | 186 (14.6)                       | 244 (26.0)                           | <0.001         |
| Interval from admission to steroid, days              | 4.0 ± 3.1                        | 2.0 ± 2.4                            | <0.001         |
| Antibiotic treatment                                  | 107 (8.4)                        | 17 (1.8)                             | <0.001         |
| Interval from admission to antibiotics, days          | 3.4 ± 3.5                        | 2.1 ± 2.4                            | 0.053          |
| <b>Outcome measures</b>                               |                                  |                                      |                |
| O <sub>2</sub> supplementation via nasal prong        | 297 (23.3)                       | 207 (22.0)                           | 0.488          |
| Interval from admission to nasal prong, days          | 16.8 ± 7.7                       | 16.8 ± 8.0                           | 0.932          |
| Composite outcome for progression to severe disease   | 87 (6.8)                         | 47 (5.0)                             | 0.076          |
| Interval from admission to composite outcome, days    | 19.9 ± 4.1                       | 20.1 ± 3.9                           | 0.257          |
| O <sub>2</sub> supplement via facial mask             | 24 (1.9)                         | 20 (2.1)                             | 0.680          |
| Interval from admission to facial mask, days          | 6.1 ± 3.3                        | 3.8 ± 2.2                            | 0.007          |
| O <sub>2</sub> supplement via HFNC                    | 41 (3.2)                         | 25 (2.7)                             | 0.449          |
| Interval from admission to HFNC, days                 | 5.2 ± 3.1                        | 3.0 ± 3.0                            | 0.006          |
| Referral to tertiary care center                      | 56 (4.4)                         | 21 (2.2)                             | 0.006          |
| Interval from admission to referral, days             | 5.7 ± 3.1                        | 3.9 ± 2.1                            | 0.017          |
| <b>Live discharge after recovery without referral</b> | 1215 (95.3)                      | 918 (97.8)                           | 0.002          |
| Interval from admission to discharge, days            | 12.4 ± 11.7                      | 9.8 ± 3.5                            | <0.001         |
| <b>In-hospital mortality during follow-up period</b>  | 4 (0.3)                          | 0 (0.0)                              | 0.142          |

Data are expressed as the number (%) of patients, mean ± SD, or median (IQR) unless indicated otherwise.

Abbreviations: NA, not applicable; HFNC, high flow nasal cannula; SD, standard deviation; IQR, interquartile range



**Supplementary Table 5. Baseline characteristics of the mild to moderate COVID-19 patients, delta-confirmed subgroup**

| <b>Characteristic</b>                  | <b>Regdanvimab<br/>(n = 692)</b> | <b>Supportive care<br/>(n = 247)</b> | <b>P value</b> |
|----------------------------------------|----------------------------------|--------------------------------------|----------------|
| <b>Demographics</b>                    |                                  |                                      |                |
| Age, years                             | 49 (36-61)                       | 43 (30-58)                           | <0.001         |
| Male gender                            | 343 (49.6)                       | 126 (51.0)                           | 0.696          |
| BMI                                    | 25.3 ± 4.2                       | 24.8 ± 4.8                           | 0.145          |
| BMI ≥ 25 kg/m <sup>2</sup>             | 345 (49.9)                       | 103 (41.7)                           | 0.031          |
| BMI ≥ 30 kg/m <sup>2</sup>             | 74 (10.7)                        | 32 (13.0)                            | 0.325          |
| Symptom onset to admission, days       | 2 (1-4)                          | 3 (1-5)                              | 0.002          |
| Vaccination (incomplete or complete)   | 229 (33.1)                       | 77 (31.2)                            | 0.581          |
| Vaccination (complete only)            | 81 (11.7)                        | 31 (12.6)                            | 0.725          |
| <b>Initial presentation</b>            |                                  |                                      |                |
| Initial Ct value (NP swab, RdRp)       | 17.8 ± 5.6                       | 18.3 ± 5.5                           | 0.213          |
| SpO <sub>2</sub> , %                   | 97.4 ± 1.0                       | 97.3 ± 1.2                           | 0.491          |
| SpO <sub>2</sub> < 97%                 | 113 (16.3)                       | 55 (22.3)                            | 0.037          |
| Pneumonia                              | 642 (92.8)                       | 217 (87.9)                           | 0.017          |
| <b>Initial laboratory tests</b>        |                                  |                                      |                |
| WBC count, x10 <sup>3</sup> /μL        | 4.8 ± 1.7                        | 5.0 ± 3.9                            | 0.304          |
| Lymphocyte count, x10 <sup>3</sup> /μL | 1.2 ± 0.5                        | 1.3 ± 0.5                            | 0.008          |
| Platelet count, x10 <sup>3</sup> /μL   | 183.4 ± 62.9                     | 181.1 ± 66.1                         | 0.629          |
| Total bilirubin, mg/dL                 | 0.5 ± 0.6                        | 0.5 ± 0.3                            | 0.954          |
| Albumin, g/dL                          | 4.42 ± 0.36                      | 4.36 ± 0.36                          | 0.020          |
| AST, IU/L                              | 36.2 ± 25.0                      | 39.7 ± 56.2                          | 0.348          |
| ALT, IU/L                              | 34.7 ± 31.0                      | 37.0 ± 41.8                          | 0.427          |
| BUN, mg/dL                             | 14.5 ± 27.1                      | 13.5 ± 11.9                          | 0.584          |
| Creatinine, mg/dL                      | 0.9 ± 0.3                        | 0.9 ± 0.9                            | 0.234          |
| LDH, IU/L                              | 291.2 ± 126.3                    | 331.1 ± 174.3                        | 0.001          |
| CRP, mg/dL                             | 2.6 ± 3.0                        | 2.1 ± 3.1                            | 0.049          |
| <b>Underlying diseases</b>             |                                  |                                      |                |
| Cardiovascular disease                 | 37 (5.3)                         | 19 (7.7)                             | 0.181          |
| Respiratory disease                    | 20 (2.9)                         | 11 (4.5)                             | 0.238          |
| Diabetes mellitus                      | 76 (11.0)                        | 21 (8.5)                             | 0.271          |
| Hypertension                           | 164 (23.7)                       | 49 (19.8)                            | 0.214          |
| Liver disease                          | 1 (0.1)                          | 1 (0.4)                              | 0.457          |
| Renal disease                          | 2 (0.3)                          | 0                                    | 1.000          |
| Solid cancer, curative                 | 21 (3.0)                         | 13 (5.3)                             | 0.108          |
| Solid cancer, metastasis               | 1 (0.1)                          | 0                                    | 1.000          |
| Solid organ transplant                 | 1 (1.0)                          | 0                                    | 1.000          |

Data are expressed as the number (%) of patients, mean ± SD, or median (IQR) unless indicated otherwise.

Abbreviations: COVID-19, coronavirus disease 2019, BMI, body mass index; Ct, cycle threshold; NP,

nasopharyngeal; RdRp, RNA-dependent RNA polymerase; SpO<sub>2</sub>, saturation of percutaneous oxygen; WBC, white blood cell; AST, aspartate aminotransferase; ALT, alanine aminotransferase; BUN, blood urea nitrogen; CPK, creatine phosphokinase; LDH, lactate dehydrogenase; CRP, C-reactive protein; SD, standard deviation; IQR, interquartile range

**Supplementary Table 6. Treatment and outcomes of the regdanvimab and supportive care groups, delta-confirmed subgroup**

| <b>Variables</b>                                      | <b>Regdanvimab<br/>(n = 692)</b> | <b>Supportive care<br/>(n = 247)</b> | <b>P value</b> |
|-------------------------------------------------------|----------------------------------|--------------------------------------|----------------|
| <b>Regdanvimab</b>                                    |                                  |                                      |                |
| Regdanvimab treatment                                 | 692 (100)                        | 0 (0.0)                              | NA             |
| Interval from symptom onset to regdanvimab, days      | 3.7 ± 1.9                        | NA                                   | NA             |
| Interval from admission to regdanvimab, days          | 1 ± 1.2                          | NA                                   | NA             |
| <b>Remdesivir, steroid, and antibiotics</b>           |                                  |                                      |                |
| Remdesivir treatment                                  | 108 (15.6)                       | 35 (14.2)                            | 0.590          |
| Interval from admission to remdesivir, days           | 2.4 ± 2.1                        | 1.7 ± 2.3                            | 0.113          |
| Steroid treatment                                     | 145 (21.0)                       | 99 (40.1)                            | <0.001         |
| Interval from admission to steroid, days              | 2.3 ± 2.4                        | 1.7 ± 2.4                            | 0.062          |
| Antibiotic treatment                                  | 16 (2.3)                         | 1 (0.4)                              | 0.055          |
| Interval from admission to antibiotics, days          | 1 (0–4)                          | 1 (NA)                               | 0.588          |
| <b>Outcome measures</b>                               |                                  |                                      |                |
| O <sub>2</sub> supplementation via nasal prong        | 149 (21.5)                       | 58 (23.5)                            | 0.526          |
| Interval from admission to nasal prong, days          | 2 ± 2.4                          | 2.3 ± 2.7                            | 0.371          |
| Composite outcome for progression to severe disease   | 29 (4.2)                         | 18 (7.3)                             | 0.055          |
| Interval from admission to composite outcome, days    | 3.2 ± 2.6                        | 3.6 ± 2.9                            | 0.652          |
| O <sub>2</sub> supplement via facial mask             | 7 (1.0)                          | 13 (5.3)                             | <0.001         |
| Interval from admission to facial mask, days          | 3 (2–4)                          | 4 (2–6)                              | 0.345          |
| O <sub>2</sub> supplement via HFNC                    | 17 (2.5)                         | 8 (3.2)                              | 0.512          |
| Interval from admission to HFNC, days                 | 2 (1–6)                          | 2 (1–7)                              | 0.412          |
| Referral to tertiary care center                      | 12 (1.7)                         | 9 (3.6)                              | 0.081          |
| Interval from admission to referral, days             | 4 (2–7)                          | 4 (2–5)                              | 1.000          |
| <b>Live discharge after recovery without referral</b> | <b>680 (98.3)</b>                | <b>238 (96.4)</b>                    | <b>0.081</b>   |
| Interval from admission to discharge, days            | 9.9 ± 3.4                        | 9.6 ± 3.8                            | 0.379          |
| <b>In-hospital mortality during follow-up period</b>  | <b>0 (0.0)</b>                   | <b>0 (0.0)</b>                       | <b>NA</b>      |

Data are expressed as the number (%) of patients, mean ± SD, or median (IQR) unless indicated otherwise.

Abbreviations: NA, not applicable; HFNC, high flow nasal cannula; SD, standard deviation; IQR, interquartile range

**Supplementary Table 7. Univariable and multivariable analyses for 21-day probability of O<sub>2</sub> requirement, delta-confirmed subgroup**

| Factors for disease progression              | Univariable analysis |                | Multivariable analysis |                |
|----------------------------------------------|----------------------|----------------|------------------------|----------------|
|                                              | HR (95% CI)          | <i>P</i> value | HR (95% CI)            | <i>P</i> value |
| <b>Demographics</b>                          |                      |                |                        |                |
| Age                                          | 1.004 (0.996–1.013)  | 0.295          |                        |                |
| Age > 60 years                               | 0.663 (0.473–0.930)  | 0.017          | 0.966 (0.642–1.452)    | 0.867          |
| Age > 70 years                               | 1.143 (0.741–1.764)  | 0.544          |                        |                |
| Male gender                                  | 0.997 (0.759–1.309)  | 0.981          |                        |                |
| BMI                                          | 1.072 (1.045–1.100)  | <0.001         |                        |                |
| BMI ≥ 25 kg/m <sup>2</sup>                   | 1.777 (1.345–2.347)  | <0.001         |                        |                |
| BMI ≥ 30 kg/m <sup>2</sup>                   | 2.030 (1.432–2.876)  | <0.001         | 2.301 (1.614–3.283)    | <0.001         |
| Symptom onset to admission, days             | 1.312 (1.227–1.403)  | <0.001         | 1.159 (1.075–1.249)    | <0.001         |
| Vaccination (incomplete or complete)         | 0.800 (0.592–1.082)  | 0.148          |                        |                |
| Vaccination (complete only)                  | 0.459 (0.262–0.804)  | 0.007          | 0.602 (0.313–1.156)    | 0.127          |
| <b>Initial presentation</b>                  |                      |                |                        |                |
| Initial Ct value (NP swab, RdRp)             | 0.970 (0.945–0.996)  | 0.023          | 0.980 (0.954–1.006)    | 0.133          |
| SpO <sub>2</sub> , %                         | 0.638 (0.562–0.723)  | <0.001         |                        |                |
| SpO <sub>2</sub> < 97%                       | 2.065 (1.527–2.793)  | <0.001         | 1.861 (1.355–2.557)    | <0.001         |
| Pneumonia                                    | 2.504 (1.235–5.077)  | 0.011          | 1.403 (0.648–3.039)    | 0.391          |
| <b>Initial laboratory tests</b>              |                      |                |                        |                |
| WBC count, x10 <sup>3</sup> /μL              | 1.001 (0.949–1.056)  | 0.975          |                        |                |
| WBC count > 5500/μL                          | 1.115 (0.829–1.499)  | 0.471          |                        |                |
| Leukopenia (< 4000/μL)                       | 0.814 (0.606–1.094)  | 0.172          |                        |                |
| Neutrophil > 3500/μL                         | 1.638 (1.247–2.152)  | <0.001         |                        |                |
| Lymphopenia (< 1500/μL)                      | 2.221 (1.491–3.308)  | <0.001         | 1.709 (1.131–2.583)    | 0.011          |
| Platelet count, x10 <sup>3</sup> /μL         | 0.990 (0.987–0.993)  | <0.001         |                        |                |
| Thrombocytopenia (< 150x10 <sup>3</sup> /μL) | 2.667 (2.030–3.504)  | <0.001         | 1.742 (1.300–2.335)    | <0.001         |
| Total bilirubin, mg/dL                       | 1.084 (0.902–1.301)  | 0.389          |                        |                |
| Albumin, g/dL                                | 0.236 (0.160–0.348)  | <0.001         |                        |                |
| Albumin < 4.0 g/dL                           | 2.457 (1.728–3.494)  | <0.001         | 1.871 (1.292–2.708)    | 0.001          |
| AST, IU/L                                    | 1.006 (1.004–1.007)  | <0.001         |                        |                |
| ALT, IU/L                                    | 1.008 (1.005–1.011)  | <0.001         |                        |                |
| BUN, mg/dL                                   | 1.003 (1.000–1.005)  | 0.021          |                        |                |
| BUN elevation (> 19 mg/dL)                   | 1.515 (1.004–2.285)  | 0.048          | 1.349 (0.854–2.129)    | 0.199          |
| Creatinine, mg/dL                            | 1.160 (1.016–1.325)  | 0.028          |                        |                |
| Creatinine elevation (> 1.2 mg/dL)           | 1.201 (0.772–1.868)  | 0.417          |                        |                |
| LDH, IU/L                                    | 1.001 (1.000–1.002)  | 0.029          | 0.999 (0.998–1.000)    | 0.008          |
| LDH elevation (> 400 IU/L)                   | 1.259 (0.914–1.734)  | 0.159          |                        |                |
| CRP, mg/dL                                   | 1.187 (1.160–1.216)  | <0.001         |                        |                |
| CRP elevation (> 1.5 mg/dL)                  | 4.414 (3.202–6.085)  | <0.001         | 3.021 (2.141–4.261)    | <0.001         |
| CRP elevation (> 5 mg/dL)                    | 4.134 (3.101–5.510)  | <0.001         |                        |                |
| <b>Underlying diseases</b>                   |                      |                |                        |                |

|                              |                      |       |                     |       |
|------------------------------|----------------------|-------|---------------------|-------|
| Cardiovascular disease       | 1.210 (0.716–2.047)  | 0.476 |                     |       |
| Respiratory disease          | 0.567 (0.211–1.526)  | 0.261 |                     |       |
| Diabetes mellitus            | 1.544 (1.049–2.274)  | 0.028 | 1.238 (0.804–1.908) | 0.333 |
| Hypertension                 | 1.242 (0.912–1.690)  | 0.169 |                     |       |
| Liver disease                | 2.081 (0.292–14.841) | 0.465 |                     |       |
| Solid cancer, curative       | 0.482 (0.179–1.297)  | 0.149 |                     |       |
| Solid cancer, metastasis     | 4.535 (0.636–32.363) | 0.132 |                     |       |
| <b>Regdanvimab treatment</b> | 0.911 (0.673–1.235)  | 0.549 | 0.963 (0.697–1.329) | 0.817 |

Factors that exhibited extreme 95% CIs without statistical significance are not presented in this table.

Abbreviations: HR, hazard ratio; CI, confidence interval; BMI, body mass index; NP, nasopharyngeal; RdRp, RNA-dependent RNA polymerase; SpO<sub>2</sub>, saturation of percutaneous oxygen; WBC, white blood cell; ALT, alanine aminotransferase; AST, aspartate aminotransferase; BMI, body mass index; BUN, blood urea nitrogen; LDH, lactate dehydrogenase; CRP, C-reactive protein

**Supplementary Table 8. Univariable and multivariable analyses for 21-day probability of progression to severe disease, delta-confirmed subgroup**

| Factors for disease progression              | Univariable analysis |                | Multivariable analysis |                |
|----------------------------------------------|----------------------|----------------|------------------------|----------------|
|                                              | HR (95% CI)          | <i>P</i> value | HR (95% CI)            | <i>P</i> value |
| <b>Demographics</b>                          |                      |                |                        |                |
| Age                                          | 1.010 (0.993–1.028)  | 0.236          |                        |                |
| Age > 60 years                               | 0.641 (0.310–1.325)  | 0.230          |                        |                |
| Age > 70 years                               | 0.614 (0.191–1.976)  | 0.413          |                        |                |
| Male gender                                  | 1.047 (0.591–1.855)  | 0.875          |                        |                |
| BMI                                          | 1.050 (0.992–1.111)  | 0.094          |                        |                |
| BMI ≥ 25 kg/m <sup>2</sup>                   | 2.156 (1.179–3.942)  | 0.013          | 1.987 (1.068–3.697)    | 0.030          |
| BMI ≥ 30 kg/m <sup>2</sup>                   | 1.388 (0.622–3.099)  | 0.423          |                        |                |
| Symptom onset to admission, days             | 1.275 (1.108–1.466)  | 0.001          | 1.001 (0.848–1.182)    | 0.992          |
| Vaccination (incomplete or complete)         | 0.622 (0.317–1.223)  | 0.169          |                        |                |
| Vaccination (complete only)                  | 0.157 (0.022–1.136)  | 0.067          | 0.231 (0.032–1.691)    | 0.149          |
| <b>Initial presentation</b>                  |                      |                |                        |                |
| Initial Ct value (NP swab, RdRp)             | 0.933 (0.880–0.990)  | 0.022          | 0.934 (0.880–0.992)    | 0.025          |
| SpO <sub>2</sub> , %                         | 0.492 (0.381–0.636)  | <0.001         |                        |                |
| SpO <sub>2</sub> < 97%                       | 4.693 (2.649–8.315)  | <0.001         | 4.309 (2.411–7.701)    | <0.001         |
| Pneumonia                                    | 4.360 (0.601–31.611) | 0.145          |                        |                |
| <b>Initial laboratory tests</b>              |                      |                |                        |                |
| WBC count, x10 <sup>3</sup> /μL              | 1.024 (0.952–1.102)  | 0.518          |                        |                |
| WBC count > 5500/μL                          | 1.087 (0.582–2.031)  | 0.793          |                        |                |
| Leukopenia (< 4000/μL)                       | 1.055 (0.582–1.913)  | 0.860          |                        |                |
| Neutrophil > 3500/μL                         | 1.776 (0.999–3.156)  | 0.050          |                        |                |
| Lymphopenia (< 1500/μL)                      | 7.604 (1.845–31.345) | 0.005          | 5.119 (1.233–21.259)   | 0.025          |
| Platelet count, x10 <sup>3</sup> /μL         | 0.989 (0.983–0.995)  | <0.001         |                        |                |
| Thrombocytopenia (< 150x10 <sup>3</sup> /μL) | 2.048 (1.155–3.632)  | 0.014          | 1.144 (0.633–2.069)    | 0.656          |
| Total bilirubin, mg/dL                       | 1.051 (0.665–1.660)  | 0.831          |                        |                |
| Albumin, g/dL                                | 0.112 (0.051–0.247)  | <0.001         |                        |                |
| Albumin < 4.0 g/dL                           | 4.697 (2.543–8.673)  | <0.001         | 3.382 (1.790–6.389)    | <0.001         |
| AST, IU/L                                    | 1.006 (1.004–1.008)  | <0.001         |                        |                |
| ALT, IU/L                                    | 1.010 (1.005–1.014)  | <0.001         |                        |                |
| BUN, mg/dL                                   | 0.999 (0.985–1.014)  | 0.924          |                        |                |
| BUN elevation (> 19 mg/dL)                   | 2.060 (0.963–4.409)  | 0.063          | 1.929 (0.873–4.261)    | 0.104          |
| Creatinine, mg/dL                            | 1.084 (0.754–1.559)  | 0.664          |                        |                |
| Creatinine elevation (> 1.2 mg/dL)           | 1.180 (0.467–2.981)  | 0.727          |                        |                |
| LDH, IU/L                                    | 1.003 (1.002–1.004)  | <0.001         |                        |                |
| LDH elevation (> 400 IU/L)                   | 2.780 (1.553–4.979)  | 0.001          | 1.098 (0.566–2.129)    | 0.782          |
| CRP, mg/dL                                   | 1.206 (1.153–1.260)  | <0.001         |                        |                |
| CRP elevation (> 1.5 mg/dL)                  | 6.962 (3.119–15.542) | <0.001         | 4.169 (1.841–9.442)    | 0.001          |
| CRP elevation (> 5 mg/dL)                    | 6.885 (3.885–12.200) | <0.001         |                        |                |
| <b>Underlying diseases</b>                   |                      |                |                        |                |
| Cardiovascular disease                       | 0.687 (0.167–2.833)  | 0.604          |                        |                |
| Respiratory disease                          | 0.640 (0.088–4.643)  | 0.659          |                        |                |

|                              |                      |       |                     |       |
|------------------------------|----------------------|-------|---------------------|-------|
| Diabetes mellitus            | 1.270 (0.539–2.992)  | 0.584 |                     |       |
| Hypertension                 | 0.803 (0.388–1.661)  | 0.554 |                     |       |
| Liver disease                | 3.058 (0.422–22.172) | 0.269 |                     |       |
| Solid cancer, curative       | 1.156 (0.280–4.764)  | 0.841 |                     |       |
| <b>Regdanvimab treatment</b> | 0.568 (0.316–1.024)  | 0.060 | 0.665 (0.349–1.268) | 0.216 |

Factors that exhibited extreme 95% CIs without statistical significance are not presented in this table.

Abbreviations: HR, hazard ratio; CI, confidence interval; BMI, body mass index; NP, nasopharyngeal; RdRp, RNA-dependent RNA polymerase; SpO<sub>2</sub>, saturation of percutaneous oxygen; WBC, white blood cell; ALT, alanine aminotransferase; AST, aspartate aminotransferase; BMI, body mass index; BUN, blood urea nitrogen; LDH, lactate dehydrogenase; CRP, C-reactive protein
